# Supplementary material
Source: publisher figshare collection journal article supplement (https://karger.figshare.com/ndownloader/files/27670965)
Supplement: Supplementary file 1 [file 27670965]

**Tab. S3**: Results of ANOVA (=analysis of variance) for 144 analytes. Shown are the metabolites with their correspondent p-values and Bonferroni corrected p-values.

| **Metabolite** | **p-value** | **Bonferroni corrected p-value** |
| --- | --- | --- |
| SM C16:1 | 0.000 | 0.000 |
| SM C20:2 | 0.000 | 0.000 |
| SM C18:1 | 0.000 | 0.000 |
| PC aa C36:4 | 0.000 | 0.000 |
| SM (OH) C22:2 | 0.000 | 0.000 |
| PC aa C38:4 | 0.000 | 0.000 |
| lysoPC a C20:4 | 0.000 | 0.000 |
| PC aa C32:3 | 0.000 | 0.000 |
| PC aa C38:5 | 0.000 | 0.000 |
| SM (OH) C16:1 | 0.000 | 0.000 |
| SM C18:0 | 0.000 | 0.000 |
| PC ae C38:4 | 0.000 | 0.001 |
| SM (OH) C14:1 | 0.000 | 0.003 |
| SM C24:1 | 0.000 | 0.004 |
| PC aa C38:6 | 0.000 | 0.005 |
| PC ae C36:5 | 0.000 | 0.006 |
| PC ae C38:6 | 0.000 | 0.007 |
| PC ae C40:6 | 0.000 | 0.008 |
| PC ae C36:4 | 0.000 | 0.011 |
| SM (OH) C22:1 | 0.000 | 0.011 |
| SM C16:0 | 0.000 | 0.013 |
| PC aa C36:5 | 0.000 | 0.026 |
| Lys | 0.000 | 0.026 |
| PC aa C40:6 | 0.000 | 0.031 |
| PC ae C38:5 | 0.000 | 0.032 |
| PC aa C40:5 | 0.000 | 0.032 |
| PC aa C34:4 | 0.000 | 0.042 |
| PC ae C40:5 | 0.000 | 0.045 |
| PC ae C40:4 | 0.000 | 0.048 |
| lysoPC a C17:0 | 0.000 | 0.056 |
| SM C24:0 | 0.000 | 0.060 |
| lysoPC a C16:0 | 0.000 | 0.063 |
| PC ae C34:3 | 0.001 | 0.128 |
| PC ae C40:2 | 0.001 | 0.141 |
| PC ae C36:1 | 0.001 | 0.160 |
| PC aa C34:2 | 0.001 | 0.166 |
| PC ae C38:0 | 0.001 | 0.170 |
| PC ae C40:1 | 0.001 | 0.183 |
| PC aa C28:1 | 0.001 | 0.197 |
| SM C26:0 | 0.001 | 0.197 |
| PC ae C36:2 | 0.002 | 0.227 |
| Val | 0.002 | 0.243 |
| PC aa C36:6 | 0.002 | 0.322 |
| PC aa C38:0 | 0.002 | 0.343 |
| PC ae C38:3 | 0.002 | 0.344 |
| SM C26:1 | 0.003 | 0.459 |
| lysoPC a C18:2 | 0.003 | 0.477 |
| PC ae C34:2 | 0.003 | 0.482 |
| PC ae C40:3 | 0.004 | 0.539 |
| alpha_AAA | 0.004 | 0.578 |
| PC aa C34:1 | 0.004 | 0.610 |
| PC aa C38:3 | 0.004 | 0.620 |
| Leu | 0.004 | 0.632 |
| Gln | 0.005 | 0.644 |
| PC aa C36:0 | 0.005 | 0.784 |
| lysoPC a C20:3 | 0.006 | 0.812 |
| C10 | 0.007 | 1.000 |
| Taurine | 0.008 | 1.000 |
| lysoPC a C18:0 | 0.009 | 1.000 |
| PC aa C42:1 | 0.011 | 1.000 |
| His | 0.014 | 1.000 |
| C18 | 0.015 | 1.000 |
| PC aa C40:4 | 0.015 | 1.000 |
| PC ae C42:1 | 0.016 | 1.000 |
| PC ae C44:6 | 0.018 | 1.000 |
| PC ae C42:2 | 0.019 | 1.000 |
| SM (OH) C24:1 | 0.020 | 1.000 |
| PC ae C36:3 | 0.020 | 1.000 |
| PC ae C42:3 | 0.022 | 1.000 |
| lysoPC a C18:1 | 0.025 | 1.000 |
| Ser | 0.025 | 1.000 |
| Glu | 0.026 | 1.000 |
| lysoPC a C28:1 | 0.030 | 1.000 |
| Ala | 0.034 | 1.000 |
| PC ae C34:1 | 0.036 | 1.000 |
| PC aa C42:0 | 0.043 | 1.000 |
| PC aa C34:3 | 0.044 | 1.000 |
| PC aa C36:3 | 0.047 | 1.000 |
| C5 | 0.049 | 1.000 |
| Ile | 0.050 | 1.000 |
| C7-DC | 0.054 | 1.000 |
| PC aa C42:5 | 0.054 | 1.000 |
| C18:2 | 0.057 | 1.000 |
| PC aa C36:2 | 0.057 | 1.000 |
| PC ae C42:5 | 0.061 | 1.000 |
| PC ae C32:2 | 0.064 | 1.000 |
| C14:1 | 0.074 | 1.000 |
| Sarcosine | 0.074 | 1.000 |
| C2 | 0.076 | 1.000 |
| PC aa C30:0 | 0.076 | 1.000 |
| PC ae C34:0 | 0.077 | 1.000 |
| PC aa C32:0 | 0.085 | 1.000 |
| PC aa C38:1 | 0.092 | 1.000 |
| PC ae C42:4 | 0.097 | 1.000 |
| C14:2 | 0.098 | 1.000 |
| PC ae C44:5 | 0.101 | 1.000 |
| PC aa C42:6 | 0.102 | 1.000 |
| C6 (C4:1-DC) | 0.104 | 1.000 |
| C16 | 0.104 | 1.000 |
| Met | 0.109 | 1.000 |
| Thr | 0.113 | 1.000 |
| PC ae C30:1 | 0.118 | 1.000 |
| PC ae C30:0 | 0.129 | 1.000 |
| PC aa C42:4 | 0.132 | 1.000 |
| Tyr | 0.139 | 1.000 |
| Gly | 0.161 | 1.000 |
| C0 | 0.169 | 1.000 |
| PC ae C32:1 | 0.169 | 1.000 |
| Cit | 0.171 | 1.000 |
| Trp | 0.186 | 1.000 |
| Creatinine | 0.192 | 1.000 |
| lysoPC a C26:1 | 0.198 | 1.000 |
| PC aa C42:2 | 0.203 | 1.000 |
| PC ae C38:2 | 0.209 | 1.000 |
| Asn | 0.217 | 1.000 |
| Putrescine | 0.236 | 1.000 |
| t4-OH-Pro | 0.245 | 1.000 |
| C3 | 0.256 | 1.000 |
| Orn | 0.259 | 1.000 |
| lysoPC a C16:1 | 0.271 | 1.000 |
| PC aa C36:1 | 0.277 | 1.000 |
| PC ae C38:1 | 0.298 | 1.000 |
| C3-DC (C4-OH) | 0.318 | 1.000 |
| PC ae C36:0 | 0.321 | 1.000 |
| Phe | 0.322 | 1.000 |
| PC aa C32:1 | 0.325 | 1.000 |
| PC aa C40:2 | 0.329 | 1.000 |
| PC aa C40:3 | 0.332 | 1.000 |
| C14 | 0.368 | 1.000 |
| lysoPC a C28:0 | 0.384 | 1.000 |
| PC ae C44:3 | 0.404 | 1.000 |
| C18:1 | 0.425 | 1.000 |
| PC ae C44:4 | 0.443 | 1.000 |
| lysoPC a C26:0 | 0.463 | 1.000 |
| C16:1 | 0.498 | 1.000 |
| PC aa C32:2 | 0.529 | 1.000 |
| H1 | 0.550 | 1.000 |
| SDMA | 0.564 | 1.000 |
| C4 | 0.616 | 1.000 |
| ADMA | 0.645 | 1.000 |
| Arg | 0.646 | 1.000 |
| Pro | 0.788 | 1.000 |
| C5-DC (C6-OH) | 0.899 | 1.000 |
| Kynurenine | 0.992 | 1.000 |
